# Supplementary material
Source: publisher site journal article supplement (https://www.dovepress.com/article/486432)
Supplement: Supplementary file 1 [file get_supplementary_file.php]

Supplementary Table 1 Comparison of baseline data and upper airway X-ray measurements

between Age Group 1(18–39 years) and Age Group 2 (40–80 years)

| Baseline data | Age Group 1  (18–39 years)  （n=183） | Age Group 2  (40–80 years)  （n=162） | | p |
| --- | --- | --- | --- | --- |
| Sex |  |  | | ＜0.001 |
| Male | 160（87.43%） | | 131（80.86%） |  |
| Female | 23（12.57%） | | 31（19.14%） |  |
| BMI | 25.89±4.36 | | 26.12±2.91 | 0.565 |
| Epworth Sleepiness Scale | 9.23±4.9 | 8.15±5.53 | | 0.560 |
| AHI | 29.99±26.84 | 33.03±23.25 | | 0.260 |
| CT90% | 0.10±0.18 | 0.11±0.14 | | 0.701 |
| LSaO2 | 0.77±0.14 | 0.50±0.08 | | 0.121 |
| MPS(N) | 89.75±9.51 | 87.4±10.58 | | 0.03 |
| POD(N) | 41.65±5.99 | 40.58±5.42 | | 0.084 |
| MPH(N) | 24.49±8.53 | 25.5±8.13 | | 0.263 |
| SP(N) | 48.43±7.07 | 49.97±6.87 | | 0.041 |
| TL(N) | 88.43±11.67 | 89.15±10.54 | | 0.555 |
| TT(N) | 74.02±6.72 | 73.06±6.02 | | 0.166 |
| TL(N)/TT(N) | 1.2±0.16 | 1.23±0.16 | | 0.131 |
| TDS(N) | 14.74±5.21 | 13.63±4.44 | | 0.035 |
| PAS(N) | 9.64±4.62 | 9.91±3.81 | | 0.555 |
| MPS(M) | 100.15±10.62 | 96.79±12.54 | | 0.007 |
| POD(M) | 44.24±6.9 | 42.61±5.98 | | 0.02 |
| MPH(M) | 18.8±7.87 | 20.58±8.45 | | 0.044 |
| SP(M) | 47.98±8.06 | 50.46±6.75 | | 0.002 |
| TL(M) | 78.31±10.94 | 79.38±10.8 | | 0.336 |
| TT(M) | 83.56±8.92 | 82.89±7.06 | | 0.443 |
| TL(M)/TT(M) | 0.96±0.36 | 0.96±0.14 | | 0.906 |
| TDS(M) | 16.71±4.91 | 16.3±5.29 | | 0.458 |
| PAS(M) | 10.64±3.47 | 10.35±3.52 | | 0.443 |
| MPS(M-N) | 10.39±5.96 | 9.39±10.81 | | 0.280 |
| POD(M-N) | 2.59±4.32 | 2.03±3.44 | | 0.188 |
| MPH(M-N) | -5.69±5.99 | -4.91±7.05 | | 0.273 |
| SP(M-N) | -0.44±5.85 | 0.49±5.17 | | 0.122 |
| TL(M-N) | -10.12±7.6 | -9.77±8.11 | | 0.68 |
| TT(M-N) | 9.54±6.94 | 9.83±5.5 | | 0.673 |

(MPS(N)：Mental Posterior Space in Normal position、POD(N)：Posterior Oropharyngeal Depth in Normal position 、MPH(N)：Mandibular plane to hyoid distance in Normal position、SP(N)：Soft Palate Length in Normal position、TL(N)：Tongue Length in Normal position、TT(N):Tongue Thickness in Normal position、TDS(N)：Tongue Depth Space in Normal position、PAS(N)：Palatal Airway Space in Normal position、MPS(M)：Mental Posterior Space in mandibular advancement state、POD(M)：Posterior Oropharyngeal Depth in mandibular advancement state、MPH(M)：Mandibular plane to hyoid distance in mandibular advancement state、SP(M)：Soft Palate Length in mandibular advancement state、TL(M)：Tongue Length in mandibular advancement state、TT(M):Tongue Thickness in mandibular advancement state、TDS(M)：Tongue Depth Space in mandibular advancement state、PAS(M)：Palatal Airway Space in mandibular advancement state、MPS (M-N):The difference between the Mental Posterior Space in the mandibular advancement state and the normal position、POD (M-N):The difference between the Posterior Oropharyngeal Depth in the mandibular advancement state and the normal position、MPH (M-N):The difference between the Mandibular plane to hyoid distance in the mandibular advancement state and the normal position、SP(M-N):The difference between the Soft Palate Length in the mandibular advancement state and the normal position、TL(M-N):The difference between the Tongue Length in the mandibular advancement state and the normal position、TT(M-N):The difference between the Tongue Thickness in the mandibular advancement state and the normal position.、OSA: Obstructive sleep apnea、BMI: body mass index、AHI: Apnea hypopnea index、LSaO2: minimum blood oxygen saturation、CT90%: Percentage of total sleep time with blood oxygen saturation below 90%))

Supplementary Table 2 Comparison of baseline data and upper airway X-ray measurements

between Non-OSA and OSA Patients Stratified by Gender

| Baseline data | Male-OSA  （n=254） | Male  Non-OSA（n=37） | Female OSA（n=36） | Female  Non-OSA  （n=18） | p |
| --- | --- | --- | --- | --- | --- |
| Age | 40.48±10.77 | 37.03±8.75 | 46.64±14.62 | 36.17±10.65 | 0.001 |
| BMI | 26.6±3.45 | 23.91±3.67 | 25.72±4.1 | 22.42±3.85 | ＜0.001 |
| AHI | 38.21±23.88 | 2.53±1.21 | 27.82±21.44 | 2.06±1.12 | ＜0.001 |
| CT90% | 0.12±0.19 | 0 | 0.1±0.3 | 0 | ＜0.001 |
| LSaO2 | 0.73±0.13 | 0.89±0.05 | 0.77±0.12 | 0.89±0.05 | ＜0.001 |
| Epworth Sleepiness Scale | 9.06±5.29 | 9.11±5.32 | 6.56±4.63 | 7.56±4.3 | 0.039 |
| MPS(N) | 90.2±10.26 | 89.23±8.1 | 82.1±5.78 | 78.61±6.82 | ＜0.001 |
| POD(N) | 42.78±5.02 | 40.84±4.83 | 34.04±2.76 | 32.96±3.32 | ＜0.001 |
| MPH(N) | 26.94±7.86 | 21.16±7.61 | 19.81±6.56 | 15.21±5.73 | ＜0.001 |
| SP(N) | 50.71±6.69 | 47.55±5.82 | 43.64±5.7 | 41.5±4.78 | ＜0.001 |
| TL(N) | 91.89±9.95 | 84.91±7.91 | 79.59±7.73 | 70.96±9.59 | ＜0.001 |
| TT(N) | 74.57±6.35 | 74.14±5.27 | 69.18±4.67 | 67.09±5.1 | ＜0.001 |
| TL(N)/TT(N) | 1.24±0.16 | 1.15±0.12 | 1.16±0.14 | 1.06±0.16 | ＜0.001 |
| TDS(N) | 14.7±4.98 | 14.74±4.59 | 11.85±4.19 | 11.2±2.79 | ＜0.001 |
| PAS(N) | 9.96±4.39 | 10±3.48 | 8.74±4.04 | 8.6±3.89 | 0.253 |
| MPS(M) | 100.15±11.87 | 99.37±10.09 | 91.95±7.7 | 87.84±8.05 | ＜0.001 |
| POD(M) | 45.05±5.8 | 43.42±6.53 | 37.02±4.49 | 34.18±3.4 | ＜0.001 |
| MPH(M) | 21.12±7.94 | 16.65±8.41 | 16.46±6.21 | 11.14±6.24 | ＜0.001 |
| SP(M) | 50.4±7.32 | 48.67±6.71 | 45.07±6.74 | 40.62±5.89 | ＜0.001 |
| TL(M) | 81.95±9.64 | 72.77±9.47 | 70.74±8.73 | 63.1±5.94 | ＜0.001 |
| TT(M) | 84.34±8.18 | 85.2±6.12 | 77.96±5.21 | 74.48±5.18 | ＜0.001 |
| TL(M)/TT(M) | 0.99±0.31 | 0.86±0.12 | 0.91±0.13 | 0.85±0.09 | 0.006 |
| TDS(M) | 16.8±5.18 | 16.23±5.59 | 16±4.41 | 14.24±3.32 | 0.183 |
| PAS(M) | 10.6±3.4 | 10.84±3.66 | 9.59±3.75 | 10.28±3.86 | 0.380 |
| MPS(M-N) | 9.95±9.49 | 10.14±5.2 | 9.86±6.08 | 9.24±3.96 | 0.987 |
| POD(M-N) | 2.28±4.04 | 2.58±3.77 | 2.98±3.89 | 1.22±2.44 | 0.456 |
| MPH(M-N) | -5.81±6.52 | -4.5±6.04 | -3.35±7.04 | -4.07±5.64 | 0.112 |
| SP(M-N) | -0.31±5.85 | 1.12±4.99 | 1.42±4.61 | -0.88±3.17 | 0.162 |
| TL(M-N) | -9.94±7.87 | -12.14±6.71 | -8.85±8.06 | -7.86±8.67 | 0.181 |
| TT(M-N) | 9.76±6.69 | 11.06±4.86 | 8.78±5.5 | 7.4±3.42 | 0.178 |

(MPS(N)：Mental Posterior Space in Normal position、POD(N)：Posterior Oropharyngeal Depth in Normal position 、MPH(N)：Mandibular plane to hyoid distance in Normal position、SP(N)：Soft Palate Length in Normal position、TL(N)：Tongue Length in Normal position、TT(N):Tongue Thickness in Normal position、TDS(N)：Tongue Depth Space in Normal position、PAS(N)：Palatal Airway Space in Normal position、MPS(M)：Mental Posterior Space in mandibular advancement state、POD(M)：Posterior Oropharyngeal Depth in mandibular advancement state、MPH(M)：Mandibular plane to hyoid distance in mandibular advancement state、SP(M)：Soft Palate Length in mandibular advancement state、TL(M)：Tongue Length in mandibular advancement state、TT(M):Tongue Thickness in mandibular advancement state、TDS(M)：Tongue Depth Space in mandibular advancement state、PAS(M)：Palatal Airway Space in mandibular advancement state、MPS (M-N):The difference between the Mental Posterior Space in the mandibular advancement state and the normal position、POD (M-N):The difference between the Posterior Oropharyngeal Depth in the mandibular advancement state and the normal position、MPH (M-N):The difference between the Mandibular plane to hyoid distance in the mandibular advancement state and the normal position、SP(M-N):The difference between the Soft Palate Length in the mandibular advancement state and the normal position、TL(M-N):The difference between the Tongue Length in the mandibular advancement state and the normal position、TT(M-N):The difference between the Tongue Thickness in the mandibular advancement state and the normal position.、OSA: Obstructive sleep apnea、BMI: body mass index、AHI: Apnea hypopnea index、LSaO2: minimum blood oxygen saturation、CT90%: Percentage of total sleep time with blood oxygen saturation below 90%))
